# Supplementary material for: Vibrational studies of ground state 4-dimethylaminobenzonitrile (DMABN) and its ring deuterated isotopomer DMABN-d4
Source: Royal Society of Chemistry journal article supplement (doi:10.1039/b101291f), 2001-01-01
Supplement: captions.doc [file captions.doc]

Supplementary material:

Figure S1. Normal mode vibrational motions resulting from DFT calculations for the 37 observed vibrational bands of ground state DMABN. For each diagram, the calculated frequency and its experimental value (in cm-1) are given as listed in Table 2.

Figure S2. Normal mode vibrational motions resulting from DFT calculation for the 32 observed vibrational bands (300-1700 cm-1 range) of ground state DMABN-d4. For each diagram, the calculated frequency and its experimental value (in cm-1) are given as listed in Table 3.
